# Supplementary material for: Quantitative Description of Glycan-Receptor Binding of Influenza A Virus H7 Hemagglutinin
Source: PubMed Central journal article supplement (PMC3577880; doi:10.1371/journal.pone.0049597), 2013-02-20
Supplement: pone.0049597.s003.pdf [file pone.0049597.s003.pdf]

**Supplementary Table S1. Expanded nomenclature of glycans used in the glycan array**

| <b>Glycan</b> | <b>Expanded nomenclature</b>                                                                                          |
|---------------|-----------------------------------------------------------------------------------------------------------------------|
| 3'SLN         | Neu5Ac $\alpha$ 2-3Gal $\beta$ 1-4GlcNAc $\beta$ 1-                                                                   |
| 6'SLN         | Neu5Ac $\alpha$ 2-6Gal $\beta$ 1-4GlcNAc $\beta$ 1-                                                                   |
| 3'SLN-LN      | Neu5Ac $\alpha$ 2-3Gal $\beta$ 1-4GlcNAc $\beta$ 1-3Gal $\beta$ 1-4GlcNAc $\beta$ 1-                                  |
| 6'SLN-LN      | Neu5Ac $\alpha$ 2-6Gal $\beta$ 1-4GlcNAc $\beta$ 1-3Gal $\beta$ 1-4GlcNAc $\beta$ 1-                                  |
| 3'SLN-LN-LN   | Neu5Ac $\alpha$ 2-3Gal $\beta$ 1-4GlcNAc $\beta$ 1-3Gal $\beta$ 1-4GlcNAc $\beta$ 1-3Gal $\beta$ 1-4GlcNAc $\beta$ 1- |

Key: Neu5Ac: N-acetyl D-neuraminic acid; Gal: D-galactose; GlcNAc: N-acetyl D-glucosamine.  $\alpha$  /  $\beta$ : anomeric configuration of the pyranose sugars. All the sugars are linked via a spacer to biotin (-Sp-LC-LC-Biotin as described in <http://www.functionalglycomics.org/static/consortium/resources/resourcecored5.shtml>)
